# Supplementary material for: HDAC class I inhibitor domatinostat sensitizes pancreatic cancer to chemotherapy by targeting cancer stem cell compartment via FOXM1 modulation
Source: Springer Nature journal article supplement (doi:10.1186/s13046-022-02295-4), 2022-03-03
Supplement: MOESM1 [file 20189488]

| IC50 <sup>96h</sup> |                    |                   |             |               |              |                   |
|---------------------|--------------------|-------------------|-------------|---------------|--------------|-------------------|
| Cell lines          | domatinostat<br>μM | Gemcitabine<br>nM | Taxol<br>nM | 5' DFUR<br>μM | SN-38<br>nM  | Oxaliplatin<br>μM |
| PANC1               | 0.56 ± 0.19        | 16.72 ± 2.05      | 6.75 ± 1.06 | 26.68 ± 8.51  | 3.33 ± 1.46  | 1.30 ± 0.42       |
| ASPC1               | 0.47 ± 0.14        | 13.87 ± 2.42      | 3.69 ± 1.80 | 30.00 ± 8.46  | 25.58 ± 5.16 | 26.29 ± 4.16      |
| PANC28              | 0.32 ± 0.03        | 54.20 ± 6.14      | 1.41 ± 0.50 | 10.30 ± 4.53  | 5.38 ± 1.72  | 2.07 ± 1.60       |
| BJhTERT             | 0.66 ± 0.28        | ND                | 49 ± 1.41   | 56.7 ± 5.7    | 27.5 ± 3.53  | 8.2 ± 1.87        |

**Supplementary Table S1. Pancreatic cancer cells sensitivity.**

Anti-proliferative effects of domatinostat and gemcitabine, taxol, 5'DFUR, SN-38 and oxaliplatin evaluated as half maximal inhibitory concentration (IC50) upon 96 hours of treatment.

| Cell lines | treatment                      | 50:50 Combination domatinostat+ Chemo96h |                    |                                     |                                              | 50:50 Sequential Treatment domatinostat96h ->Chemo72h |                    |                                     |                                              |
|------------|--------------------------------|------------------------------------------|--------------------|-------------------------------------|----------------------------------------------|-------------------------------------------------------|--------------------|-------------------------------------|----------------------------------------------|
|            |                                | $CI_{50} (\pm SD)$                       | $CI_{75} (\pm SD)$ | $DRI_{50} (\pm SD)$<br>domatinostat | $DRI$ at $CI_{50}$<br>( $\pm SD$ )<br>chemio | $CI_{50} (\pm SD)$                                    | $CI_{75} (\pm SD)$ | $DRI_{50} (\pm SD)$<br>domatinostat | $DRI$ at $CI_{50}$<br>( $\pm SD$ )<br>chemio |
| PANC28     | domatinostat+Gemcitabine (Gem) | 0.90±0.12                                | 0.89±0.03          | 1.52±0.14                           | 3.35±1.15                                    | 0.84±0.06                                             | 0.64±0.21          | 2.10±0.00                           | 2.98±0.64                                    |
|            | domatinostat+Taxol (Tax)       | 0.50±0.12                                | 0.44±0.09          | 15.15±13.64                         | 16.17±12.85                                  | 0.66±0.26                                             | 0.75±0.32          | 3.17±0.14                           | 3.57±2.16                                    |
|            | domatinostat+GemTax            | 0.92±0.16                                | 1.11±0.15          | 1.33±0.75                           | 1.37±0.31                                    | 1.08±0.02                                             | 1.03±0.42          | 1.56±0.26                           | 2.35±0.43                                    |
| PANC1      | domatinostat+Gemcitabine (Gem) | 1.05±0.13                                | 1.07±0.16          | 2.23±0.6                            | 1.4±0.18                                     | 0.75±0.07                                             | 0.60±0.29          | 2.12±0.38                           | 4.88±0.25                                    |
|            | domatinostat+Taxol (Tax)       | 0.67±0.14                                | 0.60±0.11          | 2.36±0.72                           | 4.22±2.65                                    | 0.60±0.07                                             | 0.75±0.35          | 3.30±1.92                           | 2.86±1.60                                    |
|            | domatinostat+GemTax            | 0.52±0.35                                | 0.84±0.1           | 2.9±1.3                             | 1.98±0.66                                    | 1.03±0.16                                             | 0.89±0.14          | 1.60±0.45                           | 1.82±0.26                                    |
| ASPC1      | domatinostat+Gemcitabine (Gem) | 0.96±0.80                                | 0.90±0.18          | 4.36±2.86                           | 3.57±2.18                                    | 0.82±0.03                                             | 0.55±0.13          | 1.85±0.35                           | 3.70±0.56                                    |
|            | domatinostat+Taxol (Tax)       | 0.74±0.24                                | 1.07±0.55          | 2.71±1.68                           | 4.09±0.99                                    | 0.81±0.33                                             | 1.59±0.6           | 3.29±1.44                           | 1.63±0.38                                    |
|            | domatinostat+GemTax            | 0.86±0.02                                | 1.01±0.16          | 3.15±1.34                           | 3.43±0.32                                    | 1.27±0.13                                             | 1.11±0.06          | 1.55±0.47                           | 1.58±1.11                                    |
| BjH1TERT   | domatinostat+Gemcitabine (Gem) | ND                                       | ND                 | ND                                  | ND                                           | ND                                                    | ND                 | ND                                  | ND                                           |
|            | domatinostat+Taxol (Tax)       | 2.51±0.66                                | 12.14±17.28        | 0.56±0.35                           | 7.16±7.71                                    | 1.28±0.58                                             | 1.4±1.12           | 3.54±2.51                           | 2.15±1.9                                     |
|            | domatinostat+GemTax            | ND                                       | ND                 | ND                                  | ND                                           | ND                                                    | ND                 | ND                                  | ND                                           |

- < 0,9 synergism  
■ 0,9 < x < 1,10 additivity

**Supplementary Table 2. Screening domatinostat in combination with chemotherapeutics on cell proliferation by SRB assay and Calcsyn software.** Combination Index 50 and Index 75 of simultaneous and sequential treatment of domatinostat plus Chemiotherapeutics (gemcitabine, taxol and gemcitabine plus taxol) at equi-toxic doses .

| Cell lines | treatment                     | 75:25 Combination domatinostat+ Chemo96h |                    |                                     |                                       | 75:25 Sequential Treatment domatinostat96h ->Chemo72h |                    |                                     |                                       |
|------------|-------------------------------|------------------------------------------|--------------------|-------------------------------------|---------------------------------------|-------------------------------------------------------|--------------------|-------------------------------------|---------------------------------------|
|            |                               | $CI_{50} (\pm SD)$                       | $CI_{75} (\pm SD)$ | $DRI_{50} (\pm SD)$<br>domatinostat | $DRI_{at CI_{50}} (\pm SD)$<br>chemio | $CI_{50} (\pm SD)$                                    | $CI_{75} (\pm SD)$ | $DRI_{50} (\pm SD)$<br>domatinostat | $DRI_{at CI_{50}} (\pm SD)$<br>chemio |
| PANC28     | domatinostat+Gemotabine (Gem) | 0.71±0.32                                | 0.90±0.5           | 1.24±0.57                           | 7.03±2.41                             | 0.66±0.15                                             | 0.64±0.16          | 1.57±0.41                           | 10.04±3.20                            |
|            | domatinostat+Taxol (Tax)      | 0.74±0.16                                | 0.58±0.21          | 8.51±1.81                           | 1.60±0.77                             | 0.47±0.35                                             | 0.66±0.35          | 1.38±0.28                           | 10.29±5.82                            |
|            | domatinostat+GemTax           | 0.80±0.11                                | 0.84±0.12          | 1.52±0.44                           | 6.27±3.11                             | 1.04±0.08                                             | 0.74±0.06          | 1.18±0.20                           | 3.38±1.69                             |
| PANC1      | domatinostat+Gemotabine (Gem) | 0.46±0.03                                | 0.71±0.12          | 10.18±5.03                          | 2.22±1.54                             | 0.65±0.12                                             | 0.68±0.16          | 1.56±0.30                           | 21.14±3.37                            |
|            | domatinostat+Taxol (Tax)      | 0.67±0.04                                | 0.87±0.24          | 1.56±0.58                           | 4.09±0.99                             | 1.17±0.22                                             | 1.17±0.36          | 0.99±0.29                           | 4.2±2                                 |
|            | domatinostat+GemTax           | 0.58±0.11                                | 0.78±0.03          | 1.8±0.45                            | 8.3±1.41                              | 0.73±0.23                                             | 0.7±0.02           | 2.12±1.30                           | 6.35±2.00                             |
| ASPC1      | domatinostat+Gemotabine (Gem) | 0.50±0.27                                | 0.56±0.21          | 2.57±1.22                           | 2.52±1.22                             | 0.66±0.08                                             | 0.65±0.21          | 1.55±0.21                           | 26.30±3.25                            |
|            | domatinostat+Taxol (Tax)      | 0.67±0.04                                | 1.05±0.28          | 1.17±0.23                           | 4.09±0.99                             | 0.68±0.14                                             | 0.85±0.32          | 1.69±0.28                           | 8.83±2.47                             |
|            | domatinostat+GemTax           | 0.79±0.08                                | 0.90±0.05          | 1.39±0.09                           | 7.07±1.46                             | 0.72±0.18                                             | 1.04±0.03          | 1.50±0.48                           | 17.43±2.31                            |
| BJHTERT    | domatinostat+Gemotabine (Gem) | ND                                       | ND                 | ND                                  | ND                                    | ND                                                    | ND                 | ND                                  | ND                                    |
|            | domatinostat+Taxol (Tax)      | 1.85±1.7                                 | 1.65±1.13          | 0.91±0.67                           | 48.45±13.05                           | 1.1±0.19                                              | 1.20±0.12          | 2.4±0                               | 1.46±0.61                             |
|            | domatinostat+GemTax           | ND                                       | ND                 | ND                                  | ND                                    | ND                                                    | ND                 | ND                                  | ND                                    |

■ < 0,9 synergism  
■ 0,9< x <1,10 additivity

**Supplementary Table 3. Screening domatinostat in combination with chemotherapeutics on cell proliferation by SRB assay and Calcusyn software.** Combination Index 50 and Index 75 of simultaneous and sequential treatment of domatinostat plus Chemiotherapeutics (gemcitabine, taxol and gemcitabine plus taxol) with domatinostat excess dose (75:25).

| Cell lines | treatment                 | 50:50 Combination domatinostat+ Chemo96h |                       |                                    |                             | 50:50 Sequential Treatment domatinostat96h ->Chemo72h |                       |                                    |                             |
|------------|---------------------------|------------------------------------------|-----------------------|------------------------------------|-----------------------------|-------------------------------------------------------|-----------------------|------------------------------------|-----------------------------|
|            |                           | $CI_{50}$ ( $\pm$ SD)                    | $CI_{75}$ ( $\pm$ SD) | $DI_{50}$ ( $\pm$ SD) domatinostat | $DI_{75}$ ( $\pm$ SD) chemo | $CI_{50}$ ( $\pm$ SD)                                 | $CI_{75}$ ( $\pm$ SD) | $DI_{50}$ ( $\pm$ SD) domatinostat | $DI_{75}$ ( $\pm$ SD) chemo |
| PANC28     | domatinostat+5DFUR        | 1.06 $\pm$ 0.03                          | 1.12 $\pm$ 0.10       | 2.73 $\pm$ 0.40                    | 1.42 $\pm$ 0.03             | 0.62 $\pm$ 0.25                                       | 0.56 $\pm$ 0.27       | 245 $\pm$ 1.06                     | 266 $\pm$ 0.19              |
|            | domatinostat+ SN-38       | 0.68 $\pm$ 0.14                          | 0.58 $\pm$ 0.29       | 1.23 $\pm$ 0.22                    | 1.23 $\pm$ 0.22             | 0.65 $\pm$ 0.07                                       | 0.91 $\pm$ 0.27       | 1.62 $\pm$ 0.86                    | 2.18 $\pm$ 2.00             |
|            | domatinostat+ 5DFUR/SN-38 | 1.22 $\pm$ 0.08                          | 0.90 $\pm$ 0.27       | 2.94 $\pm$ 0.82                    | 2.88 $\pm$ 0.11             | 0.89 $\pm$ 0.16                                       | 0.89 $\pm$ 0.01       | 2.14 $\pm$ 0.57                    | 2.83 $\pm$ 1.24             |
|            | domatinostat+Oxalplatin   | 0.82 $\pm$ 0.39                          | 0.91 $\pm$ 0.37       | 2.5 $\pm$ 1.13                     | 3.1 $\pm$ 1.41              | 0.75 $\pm$ 0.17                                       | 0.68 $\pm$ 0.04       | 2.19 $\pm$ 1.00                    | 2.18 $\pm$ 0.29             |
| PANC1      | domatinostat+5DFUR        | 1.05 $\pm$ 0.32                          | 1.36 $\pm$ 0.26       | 2.73 $\pm$ 0.06                    | 1.78 $\pm$ 1.03             | 0.47 $\pm$ 0.00                                       | 0.48 $\pm$ 0.06       | 2.97 $\pm$ 0.16                    | 6.82 $\pm$ 0.55             |
|            | domatinostat+ SN-38       | 1.08 $\pm$ 0.03                          | 0.80 $\pm$ 0.13       | 7.55 $\pm$ 1.2                     | 2.4 $\pm$ 0.42              | 0.60 $\pm$ 0.29                                       | 0.76 $\pm$ 0.29       | 1.29 $\pm$ 0.60                    | 2.15 $\pm$ 1.26             |
|            | domatinostat+ 5DFUR/SN-38 | 1.10 $\pm$ 0.13                          | 1.03 $\pm$ 0.02       | 2.19 $\pm$ 0.98                    | 1.46 $\pm$ 0.79             | 0.65 $\pm$ 0.16                                       | 0.53 $\pm$ 0.09       | 5.95 $\pm$ 2.05                    | 2.72 $\pm$ 0.44             |
|            | domatinostat+Oxalplatin   | 0.79 $\pm$ 0.25                          | 0.77 $\pm$ 0.27       | 2.32 $\pm$ 1.02                    | 3.45 $\pm$ 1.31             | 0.67 $\pm$ 0.07                                       | 0.85 $\pm$ 0.15       | 2.96 $\pm$ 1.81                    | 2.83 $\pm$ 1.56             |
| ASPC1      | domatinostat+5DFUR        | 1.05 $\pm$ 0.06                          | 2.54 $\pm$ 0.36       | 2.36 $\pm$ 0.08                    | 1.46 $\pm$ 0.80             | 0.88 $\pm$ 0.09                                       | 0.88 $\pm$ 0.13       | 1.64 $\pm$ 0.09                    | 38.00 $\pm$ 0.00            |
|            | domatinostat+ SN-38       | 0.45 $\pm$ 0.21                          | 0.81 $\pm$ 0.09       | 3.35 $\pm$ 1.81                    | 1.87 $\pm$ 0.84             | 0.73 $\pm$ 0.06                                       | 0.98 $\pm$ 0.16       | 1.68 $\pm$ 1.15                    | 61.46 $\pm$ 18.75           |
|            | domatinostat+ 5DFUR/SN-38 | 0.75 $\pm$ 0.08                          | 0.70 $\pm$ 0.15       | 2.02 $\pm$ 1.07                    | 2.90 $\pm$ 1.40             | 0.66 $\pm$ 0.02                                       | 0.93 $\pm$ 0.03       | 1.41 $\pm$ 0.49                    | 6.35 $\pm$ 2.94             |
|            | domatinostat+Oxalplatin   | 0.81 $\pm$ 0.03                          | 0.76 $\pm$ 0.02       | 2.19 $\pm$ 0.38                    | 2.88 $\pm$ 0.96             | 0.47 $\pm$ 0.05                                       | 0.81 $\pm$ 0.39       | 3.42 $\pm$ 1.01                    | 8.69 $\pm$ 7.08             |
| BjHTERT    | domatinostat+5DFUR        | 0.74 $\pm$ 0.41                          | 1.02 $\pm$ 0.23       | 1.87 $\pm$ 1.16                    | 5.46 $\pm$ 5.08             | 1.18 $\pm$ 0.28                                       | 1.57 $\pm$ 0.42       | 1.60 $\pm$ 0.26                    | 3.91 $\pm$ 1.13             |
|            | domatinostat+ SN-38       | 0.89 $\pm$ 0.25                          | 3.93 $\pm$ 1.52       | 2.08 $\pm$ 10.7                    | 2.92 $\pm$ 0.62             | 1.00 $\pm$ 0.12                                       | 1.23 $\pm$ 0.5        | 1.5 $\pm$ 0.14                     | 3.43 $\pm$ 1.86             |
|            | domatinostat+ 5DFUR/SN-38 | 1.25 $\pm$ 0.18                          | 1.96 $\pm$ 0.34       | 1.69 $\pm$ 0.75                    | 1.75 $\pm$ 0.24             | 1.06 $\pm$ 0.10                                       | 1.22 $\pm$ 0.18       | 1.65 $\pm$ 0.54                    | 3.33 $\pm$ 1.57             |
|            | domatinostat+Oxalplatin   | 1.05 $\pm$ 0.15                          | 1.43 $\pm$ 0.35       | 1.70 $\pm$ 0.71                    | 2.83 $\pm$ 1.04             | 1.02 $\pm$ 0.04                                       | 1.17 $\pm$ 0.29       | 1.90 $\pm$ 0.70                    | 3.01 $\pm$ 1.21             |

- < 0,9 synergism
- 0,9< x <1,10 additivity

**Supplementary Table 4. Screening domatinostat in combination with chemotherapeutics on cell proliferation by SRB assay and Calcusyn software.** Combination Index 50 and Index 75 of simultaneous and sequential treatment of domatinostat plus chemotherapeutics (5'DFUR, SN-38, oxaliplatin and 5'DFUR plus SN-38) at equitoxic doses (50:50). **B.** Combination Index 50 and Index 75 of simultaneous and sequential treatment of domatinostat plus chemotherapeutics (5'DFUR, SN-38, oxaliplatin and 5'DFUR plus SN-38) with an excess of domatinostat (75:25).

| Cell lines | treatment                 | 75:25 Combination domatinostat+ Chemo96h |                        |                                      |                                              | 75:25 Sequential Treatment domatinostat96h ->Chemo72h |                        |                                      |                                              |
|------------|---------------------------|------------------------------------------|------------------------|--------------------------------------|----------------------------------------------|-------------------------------------------------------|------------------------|--------------------------------------|----------------------------------------------|
|            |                           | CI <sub>50</sub> (±SD)                   | CI <sub>75</sub> (±SD) | DFI <sub>50</sub> (±SD) domatinostat | DFI <sub>atCI<sub>50</sub></sub> (±SD) chemo | CI <sub>50</sub> (±SD)                                | CI <sub>75</sub> (±SD) | DFI <sub>50</sub> (±SD) domatinostat | DFI <sub>atCI<sub>50</sub></sub> (±SD) chemo |
| PANC28     | domatinostat+5DFUR        | 0.95±0.05                                | 0.71±0.17              | 1.41±0.30                            | 2.58±0.55                                    | 0.64±0.19                                             | 0.61±0.20              | 2.0±0.56                             | 7.97±2.58                                    |
|            | domatinostat+ SN3-8       | 0.81±0.14                                | 1.09±0.04              | 1.23±0.20                            | 4.80±2.60                                    | 0.56±0.32                                             | 0.68±0.19              | 1.75±1.19                            | 24.92±5.14                                   |
|            | domatinostat+ 5DFUR/SN-38 | 0.61±0.09                                | 0.96±0.08              | 2.16±0.50                            | 5.30±1.69                                    | 0.59±0.07                                             | 0.63±0.14              | 1.52±0.39                            | 29.8±6.95                                    |
|            | domatinostat+Oxaliplatin  | 0.70±0.36                                | 0.92±0.36              | 1.69±1.05                            | 3.12±0.43                                    | 1.03±0.04                                             | 1.02±0.02              | 1.07±0.30                            | 3.75±0.45                                    |
| PANC1      | domatinostat+5DFUR        | 0.87±0.07                                | 1.10±0.54              | 1.24±0.27                            | 4.29±0.3.52                                  | 0.61±0.02                                             | 0.61±0.20              | 2±0.56                               | 7.97±2.58                                    |
|            | domatinostat+ SN-38       | 1.18±0.14                                | 1.26±0.26              | 0.98±0.08                            | 4.09±1.55                                    | 0.53±0.10                                             | 1.24±0.21              | 1.34±0.70                            | 16.05±9.31                                   |
|            | domatinostat+ 5DFUR/SN-38 | 1.07±0.11                                | 1.45±0.51              | 1.14±0.38                            | 2.62±1.05                                    | 0.86±0.03                                             | 0.66±0.04              | 1.59±0.40                            | 7.63±2.87                                    |
|            | domatinostat+Oxaliplatin  | 0.77±0.103                               | 0.52±0.24              | 3.23±1.16                            | 2.66±0.87                                    | 1.47±0.50                                             | 1.08±0.05              | 0.79±0.23                            | 3.71±0.19                                    |
| ASPC1      | domatinostat+5DFUR        | 1.08±0.04                                | 1.09±0.09              | 1.13±0.16                            | 3.49±0.43                                    | 0.67±0.16                                             | 1.05±0.02              | 1.82±0.13                            | 7.28±5.74                                    |
|            | domatinostat+ SN-38       | 1.29±0.12                                | 1.63±0.61              | 0.85±0.01                            | 37.8±12.3                                    | 0.86±0.23                                             | 0.98±0.11              | 1.54±0.48                            | 9.61±1.68                                    |
|            | domatinostat+ 5DFUR/SN-38 | 0.9±0.17                                 | 1.08±0.18              | 1.18±0.36                            | 4.91±1.66                                    | 0.75±0.09                                             | 0.63±0.17              | 1.36±0.19                            | 29.45±0.07                                   |
|            | domatinostat+Oxaliplatin  | 1.24±0.06                                | 1.65±0.51              | 0.89±0.04                            | 8.80±3.79                                    | 0.73±0.13                                             | 0.88±0.02              | 1.21±0.78                            | 3.05±1.59                                    |
| BjHTERT    | domatinostat+5DFUR        | 0.68±0.6                                 | 0.96±0.16              | 2.54±2.2                             | 21.4±11.6                                    | 1.65±0.57                                             | 0.83±0.14              | 1.53±0.73                            | 14.58±3.19                                   |
|            | domatinostat+ SN-38       | 2.76±1.47                                | 2.45±0.62              | 0.44±2.5                             | 23.18±3.15                                   | 1.51±0.18                                             | 1.31±0.40              | 0.88±0.35                            | 9.77±1.47                                    |
|            | domatinostat+ 5DFUR/SN-38 | 1.88±0.70                                | 1.42±0.52              | 1.11±0.53                            | 3.45±0.53                                    | 1.26±0.19                                             | 1.02±0.15              | 1.53±0.57                            | 14.58±3.19                                   |
|            | domatinostat+Oxaliplatin  | 1.14±0.07                                | 1.4±0.38               | 1.12±0.31                            | 4.25±2.05                                    | 0.85±0.12                                             | 1.25±0.55              | 1.34±0.21                            | 10.67±3.36                                   |

■ < 0,9 synergism  
■ 0,9< x <1,10 additivity

**Supplementary Table 5. Screening domatinostat in combination with chemotherapeutics on cell proliferation by SRB assay and Calculusyn software.** Combination Index 50 and Index 75 of simultaneous and sequential treatment of domatinostat plus chemitherapeutics (5'DFUR, SN-38, oxaliplatin and 5'DFUR plus SN-38) with an excess of domatinostat (75:25).

| <i>Oxidative stress genes related to bad prognosis [9]</i> | <i>baseMean</i> | <i>log<sub>2</sub>FoldChange</i> | <i>lfcSE</i> | <i>stat</i> | <i>pvalue</i> | <i>padj</i> |
|------------------------------------------------------------|-----------------|----------------------------------|--------------|-------------|---------------|-------------|
| <b>FOXM1</b>                                               | 1.33E+03        | -3.79E+00                        | 1.04E-01     | -3.63E+01   | 3.37E-288     | 1.07E-285   |
| <b>NUDT1</b>                                               | 1.49E+02        | -2.25E+00                        | 1.89E-01     | -1.19E+01   | 1.74E-32      | 1.52E-31    |
| <b>RNF7</b>                                                | 6.95E+02        | -7.76E-02                        | 1.02E-01     | -7.61E-01   | 4.47E-01      | 5.09E-01    |
| <b>EPHX2</b>                                               | 1.40E+01        | -2.04E-02                        | 4.97E-01     | -4.11E-02   | 9.67E-01      | 9.74E-01    |
| <b>SEPP1</b>                                               | 6.36E+01        | 2.04E+00                         | 2.69E-01     | 7.61E+00    | 2.83E-14      | 1.16E-13    |
| <b>DUSP1</b>                                               | 2.25E+03        | 2.20E+0                          | 8.37E-02     | 2.63E+01    | 3.48E-152     | 3.16E-150   |
| <b>TXNRD1</b>                                              | 1.52E+04        | 2.22E+00                         | 6.50E-02     | 3.41E+01    | 1.58E-254     | 4.18E-252   |

**Supplementary Table S6. Domatinostat modulates FOXM1 activity.**

The top stress-related genes [9] that established the greatest fold change in pancreatic cancer cells when domatinostat is administered at low dose for 24 hours compared to DMSO treatment. The RNA-Seq data are obtained from a domatinostat transcriptome-wide effects study in L3.6, BxPC3 and PANC1, performed by Mishra VK et al [15].

| GENE SYMBOL     | GENE ID            | PCC  |
|-----------------|--------------------|------|
| CDCA3           | ENSG00000111665.11 | 0.89 |
| NCAPD2          | ENSG00000010292.12 | 0.85 |
| <b>RAD51AP1</b> | ENSG00000111247.14 | 0.83 |
| LTBR            | ENSG00000111321.10 | 0.75 |
| CCNB2           | ENSG00000157456.7  | 0.74 |
| <b>BIRC5</b>    | ENSG00000089685.14 | 0.74 |
| CCNF            | ENSG00000162063.12 | 0.74 |
| TPX2            | ENSG00000088325.15 | 0.74 |
| PLK1            | ENSG00000166851.14 | 0.73 |
| <b>PHB2</b>     | ENSG00000215021.8  | 0.73 |
| <b>UBE2C</b>    | ENSG00000175063.16 | 0.73 |
| RP3-461F17.3    | ENSG00000268439.5  | 0.73 |
| ORC6            | ENSG00000091651.8  | 0.73 |
| KIF4A           | ENSG00000090889.11 | 0.73 |
| CDC20           | ENSG00000117399.13 | 0.73 |
| KIFC1           | ENSG00000237649.7  | 0.73 |
| KIF18B          | ENSG00000186185.13 | 0.72 |
| MRPL51          | ENSG00000111639.7  | 0.72 |
| TROAP           | ENSG00000135451.12 | 0.72 |
| <b>GAPDH</b>    | ENSG00000111640.14 | 0.72 |
| CENPH           | ENSG00000153044.9  | 0.72 |
| HMMR            | ENSG00000072571.19 | 0.72 |
| CCNB1           | ENSG00000134057.14 | 0.71 |
| MAD2L1          | ENSG00000164109.13 | 0.71 |
| KIF23           | ENSG00000137807.13 | 0.71 |
| <b>RHNO1</b>    | ENSG00000171792.10 | 0.71 |
| CDC25C          | ENSG00000158402.18 | 0.7  |
| TPI1            | ENSG00000111669.14 | 0.7  |
| <b>NEIL3</b>    | ENSG00000109674.3  | 0.7  |
| <b>ERCC6L</b>   | ENSG00000186871.6  | 0.7  |
| KIF2C           | ENSG00000142945.12 | 0.7  |
| SCNN1A          | ENSG00000111319.12 | 0.7  |
| CDCA8           | ENSG00000134690.10 | 0.7  |
| C17orf53        | ENSG00000125319.14 | 0.7  |
| EMG1            | ENSG00000126749.14 | 0.7  |
| NCAPH           | ENSG00000121152.9  | 0.7  |
| <b>PTTG1</b>    | ENSG00000164611.12 | 0.7  |
| NOP2            | ENSG00000111641.10 | 0.69 |
| CCNA2           | ENSG00000145386.9  | 0.69 |
| NDC80           | ENSG00000080986.12 | 0.69 |
| SKA3            | ENSG00000165480.15 | 0.69 |
| BLM             | ENSG00000197299.10 | 0.69 |
| MLF2            | ENSG00000089693.10 | 0.69 |
| KIF20A          | ENSG00000112984.11 | 0.68 |
| CENPF           | ENSG00000117724.12 | 0.68 |
| <b>COPS7A</b>   | ENSG00000111652.9  | 0.68 |
| <b>ASF1B</b>    | ENSG00000105011.8  | 0.68 |
| NEK2            | ENSG00000117650.12 | 0.68 |
| CD9             | ENSG0000010278.11  | 0.67 |
| CEP55           | ENSG00000138180.15 | 0.67 |
| KIF18A          | ENSG00000121621.6  | 0.67 |
| CENPU           | ENSG00000151725.11 | 0.67 |
| GINS1           | ENSG00000101003.9  | 0.66 |
| MIS18A          | ENSG00000159055.3  | 0.66 |
| ASPM            | ENSG00000066279.16 | 0.66 |
| AURKA           | ENSG00000087586.17 | 0.66 |
| RP5-940J5.6     | ENSG00000247853.2  | 0.66 |
| CDC25A          | ENSG00000164045.11 | 0.66 |
| PLK4            | ENSG00000142731.10 | 0.66 |
| GAPDHP1         | ENSG00000228232.1  | 0.66 |
| EZH2            | ENSG00000106462.10 | 0.66 |
| DIAPH3          | ENSG00000139734.17 | 0.66 |
| HJURP           | ENSG00000123485.11 | 0.66 |
| CENPA           | ENSG00000115163.14 | 0.66 |
| PRC1            | ENSG00000198901.13 | 0.65 |
| <b>USP5</b>     | ENSG00000111667.13 | 0.65 |
| TICRR           | ENSG00000140534.13 | 0.65 |
| <b>TYMS</b>     | ENSG00000176890.15 | 0.65 |
| CCDC77          | ENSG00000120647.9  | 0.65 |
| KIF15           | ENSG00000163808.16 | 0.65 |
| <b>RAD51</b>    | ENSG00000051180.16 | 0.65 |
| FANCI           | ENSG00000140525.17 | 0.64 |
| <b>TRIP13</b>   | ENSG00000071539.13 | 0.64 |
| <b>EXO1</b>     | ENSG00000174371.16 | 0.64 |
| TTK             | ENSG00000112742.9  | 0.64 |
| FAM72B          | ENSG00000188610.12 | 0.64 |
| GGH             | ENSG00000137563.11 | 0.64 |
| MCM2            | ENSG00000073111.13 | 0.64 |
| MYBL2           | ENSG00000101057.15 | 0.64 |
| NCAPG2          | ENSG00000146918.19 | 0.64 |
| SGOL1           | ENSG00000129810.14 | 0.64 |
| C16orf59        | ENSG00000162062.14 | 0.64 |
| AURKB           | ENSG00000178999.12 | 0.64 |
| <b>PIF1</b>     | ENSG00000140451.12 | 0.64 |
| ORC1            | ENSG00000085840.12 | 0.64 |
| BUB1            | ENSG00000169679.14 | 0.63 |
| FKBP4           | ENSG00000004478.7  | 0.63 |
| <b>UBE2T</b>    | ENSG00000077152.9  | 0.63 |
| <b>XRCC2</b>    | ENSG00000196584.2  | 0.63 |
| DLGAP5          | ENSG00000126787.12 | 0.63 |
| DEPDC1          | ENSG0000024526.16  | 0.63 |
| CENPN           | ENSG00000166451.13 | 0.63 |
| CDCA5           | ENSG00000146670.9  | 0.63 |
| TBC1D2          | ENSG00000095383.19 | 0.63 |
| GINS2           | ENSG00000131153.8  | 0.62 |
| CKS2            | ENSG00000123975.4  | 0.62 |
| E2F1            | ENSG00000101412.12 | 0.62 |
| AUNIP           | ENSG00000127423.10 | 0.62 |
| CDKN3           | ENSG00000100526.19 | 0.62 |
| CDT1            | ENSG00000167513.8  | 0.61 |

## FUNCTIONS

|  |                       |
|--|-----------------------|
|  | DNA repair/DNA damage |
|  | Differentiation       |
|  | Metabolism            |
|  | FOXM1 deubiquitinase  |

### Supplementary Table S7. Critical FOXM1 role in pancreatic cancer patients.

GEPIA generated a list of top 100 genes that have similar expression pattern ranked by Pearson correlation coefficient (PCC) in PAAD TCGA dataset. In yellow genes involved in DNA damage and repair, in green genes involved in differentiation pathways, in blue genes involved in metabolism process and in red USP5, the deubiquitinase gene involved in FOXM1 deubiquitination.

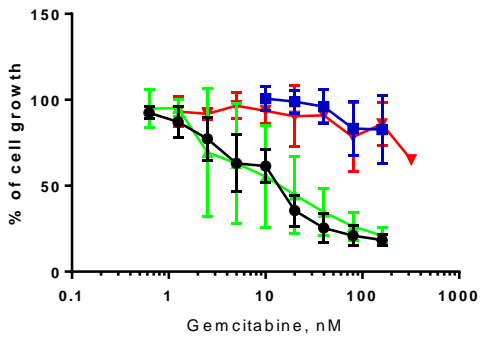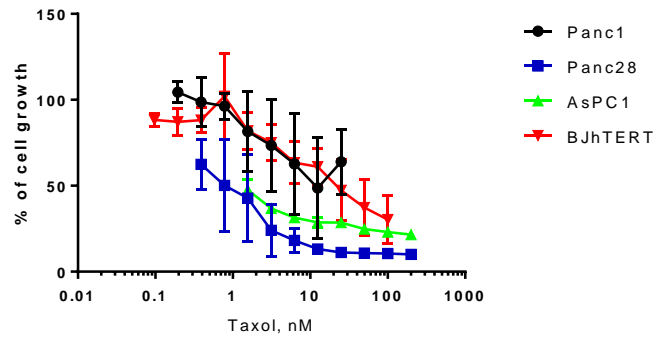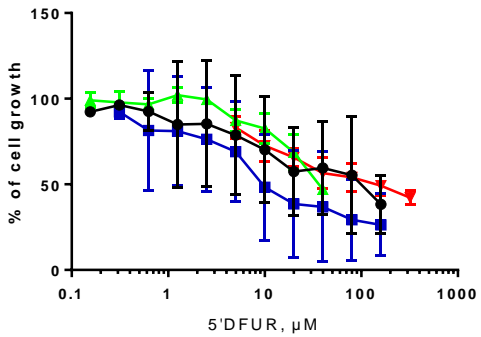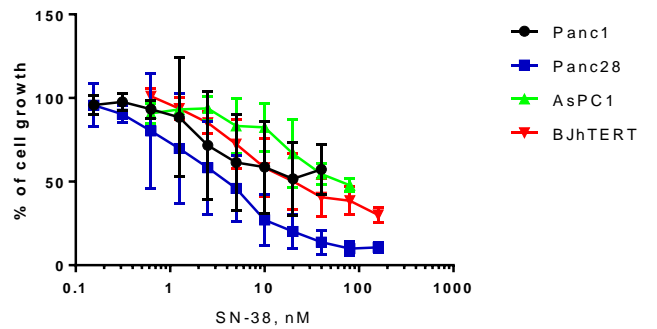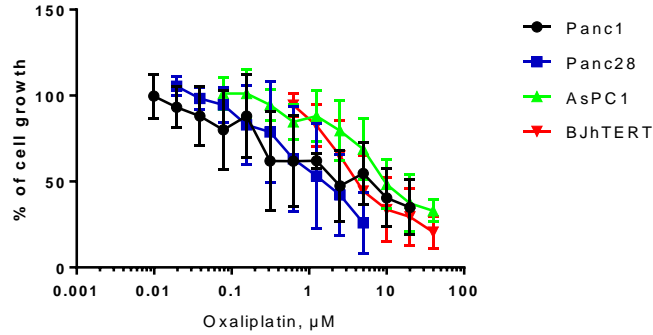

### Supplementary Figure S1. Chemotherapy effect on pancreatic cancer cells.

Cytotoxicity curves for gemcitabine, taxol, 5'DFUR, SN-38 and oxaliplatin. ASPC1, PANC1, PANC28 and BJhTERT cells were treated for 96h with increasing concentration of single drugs (doses are reported in the figure). Cell growth expressed as percentage of control was assessed by sulforhodamine B colorimetric assay.



## ASPC1

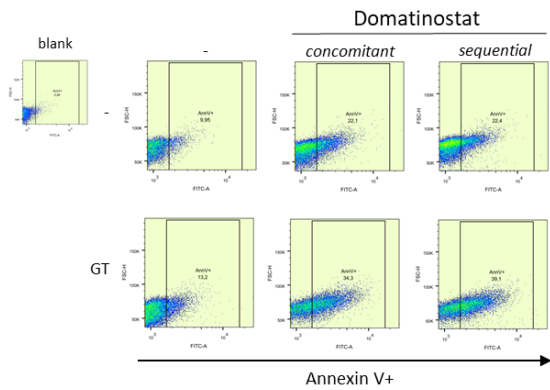

## PANC1

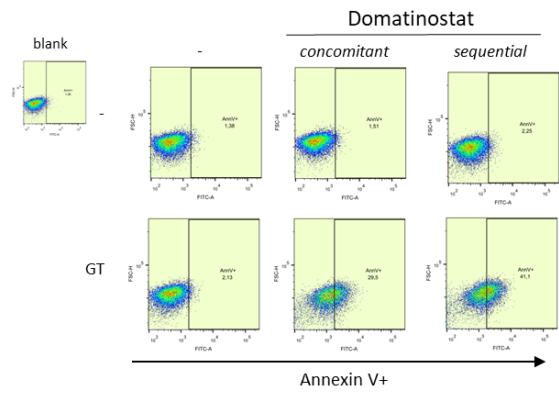

## PANC28

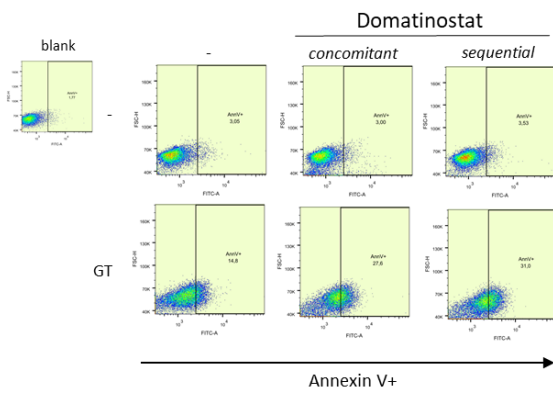

### Supplementary Figure S2. Domatinostat plus gemcitabine/taxol combination induces Annexin-V exposure.

Flow cytometry analysis of Annexin-V shows the outcome of the induced chemosensitivity in PANC1, PANC28, ASPC1 cells when domatinostat (0.5  $\mu$ M) is combined with gemcitabine/taxol (GT) (IC50 at 96h) for 24h and when domatinostat (0.5  $\mu$ M) is given 24h before gemcitabine/taxol (GT) (IC50 at 96h) for 24h.

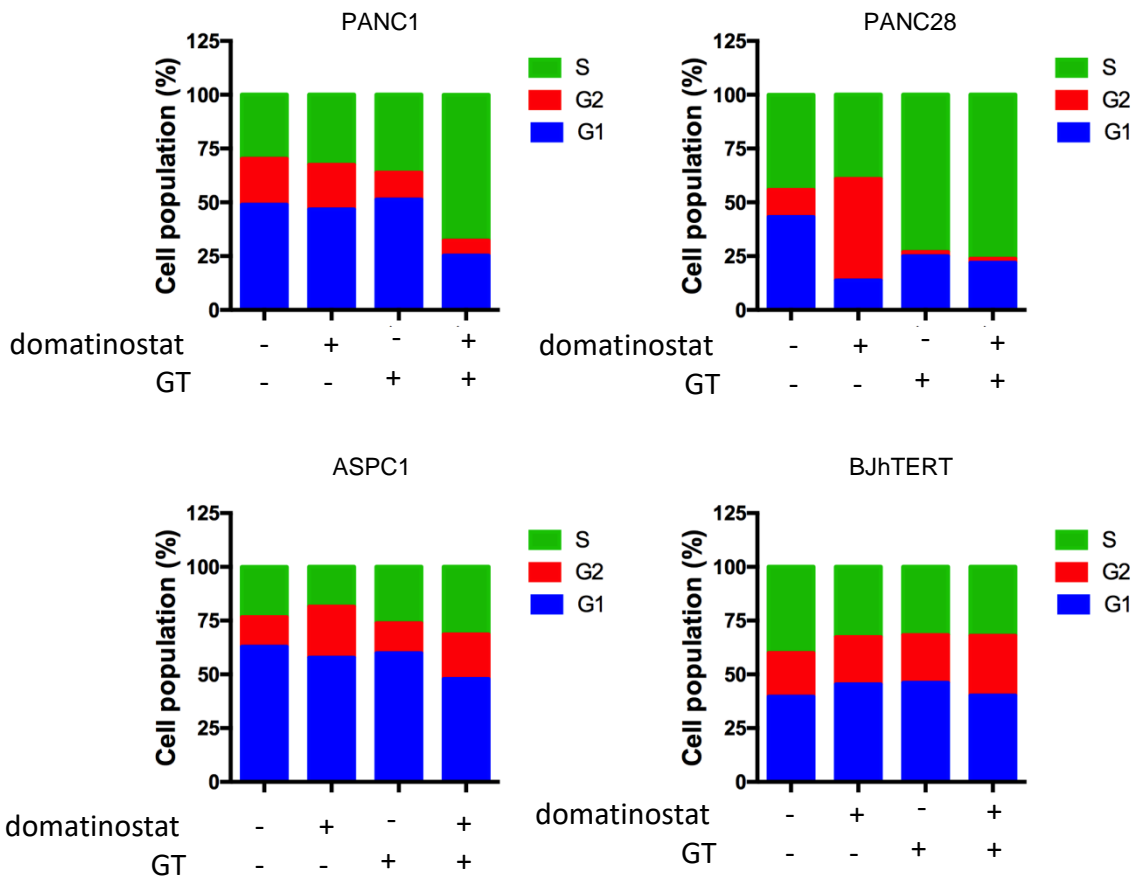

**Supplementary Figure S3. Domatinostat plus gemcitabine/taxol combination induces cell cycle perturbation and a clear block in phase S.**

Cell cycle analysis was performed in PANC1, PANC28, ASPC1 and BJhTERT cell lines. The percentage of G1, S and G2/M population were analyzed by flow cytometry on cells treated for 48 h with or without domatinostat 0.5  $\mu$ M and gemcitabine/taxol (IC50 measured for each cell lines) for 48 hours.

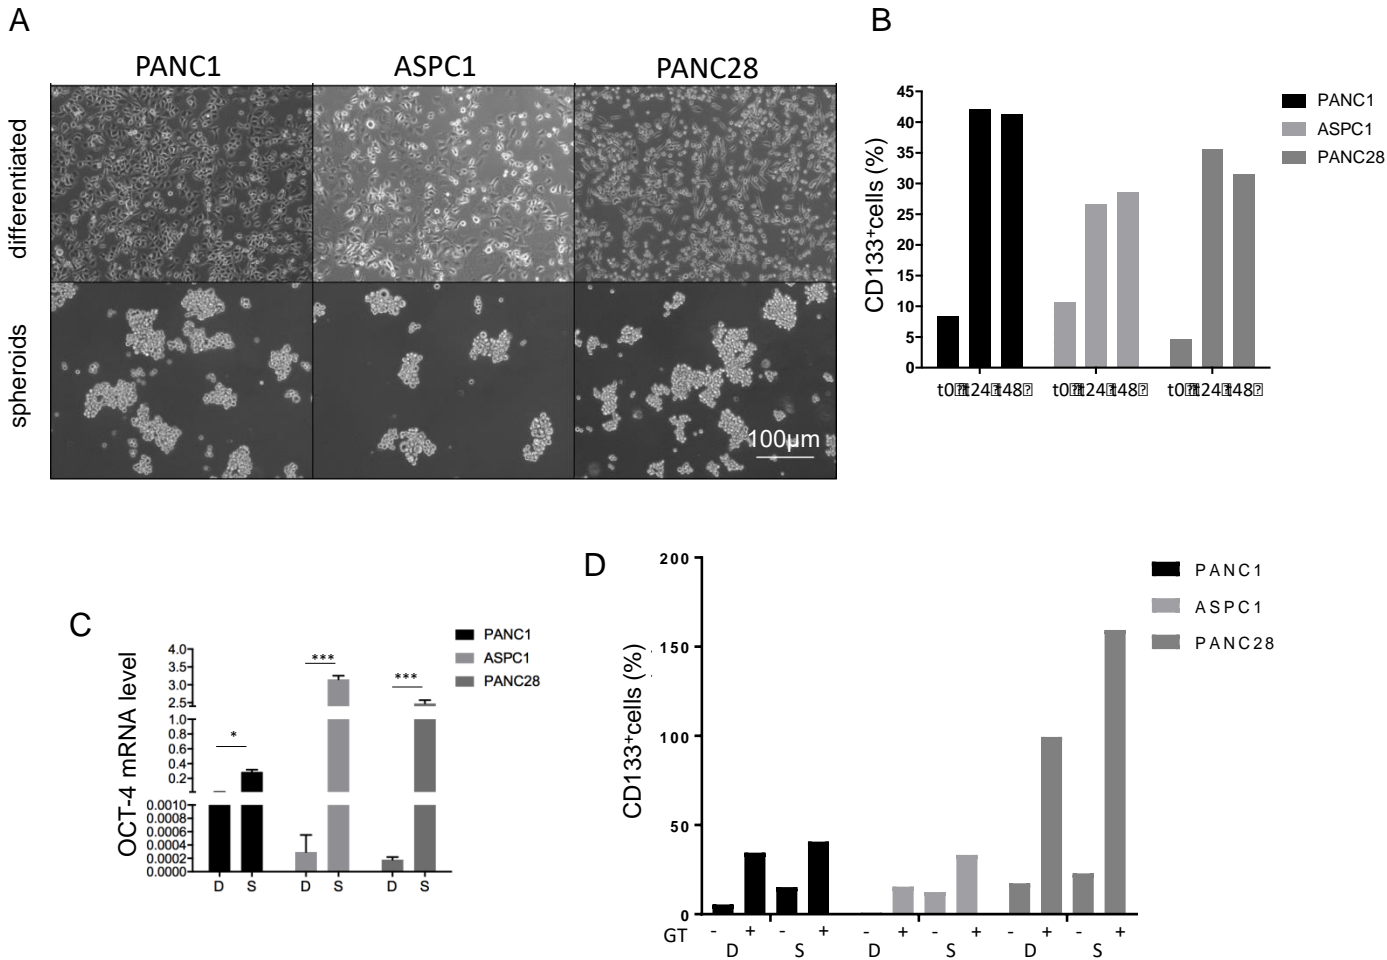

**Supplementary Figure 4. Pancreatic cancer cells enriched in stem-cell features, culturing model validation.**

**A.** Images of PANC1, PANC28, ASPC1 cells cultured in standard condition are referred as *differentiated* (D) and PANC1, PANC28, ASPC1 cells cultured in sphere medium (see Material and Methods) in low-adherent wells for 48h are referred as *spheroids* (S). White bar 100µm. Magnification 10X. **B.** Flow cytometry shows increased levels of associated stem-cell marker CD133 in PANC1, PANC28, ASPC1 culturing as spheroids for 24 and 48 hours. **C.** qRT-PCR analysis shows OCT-4 levels increase in PANC1, PANC28 and ASPC1 spheroids (S) compared to PANC1, PANC28 and ASPC1 differentiated cells (D). **D.** Flow cytometry shows increased levels of associated stem-cell marker CD133 more in spheroids than differentiated cells upon gemcitabine/taxol (IC50 at 96h) 24 hours treatment.

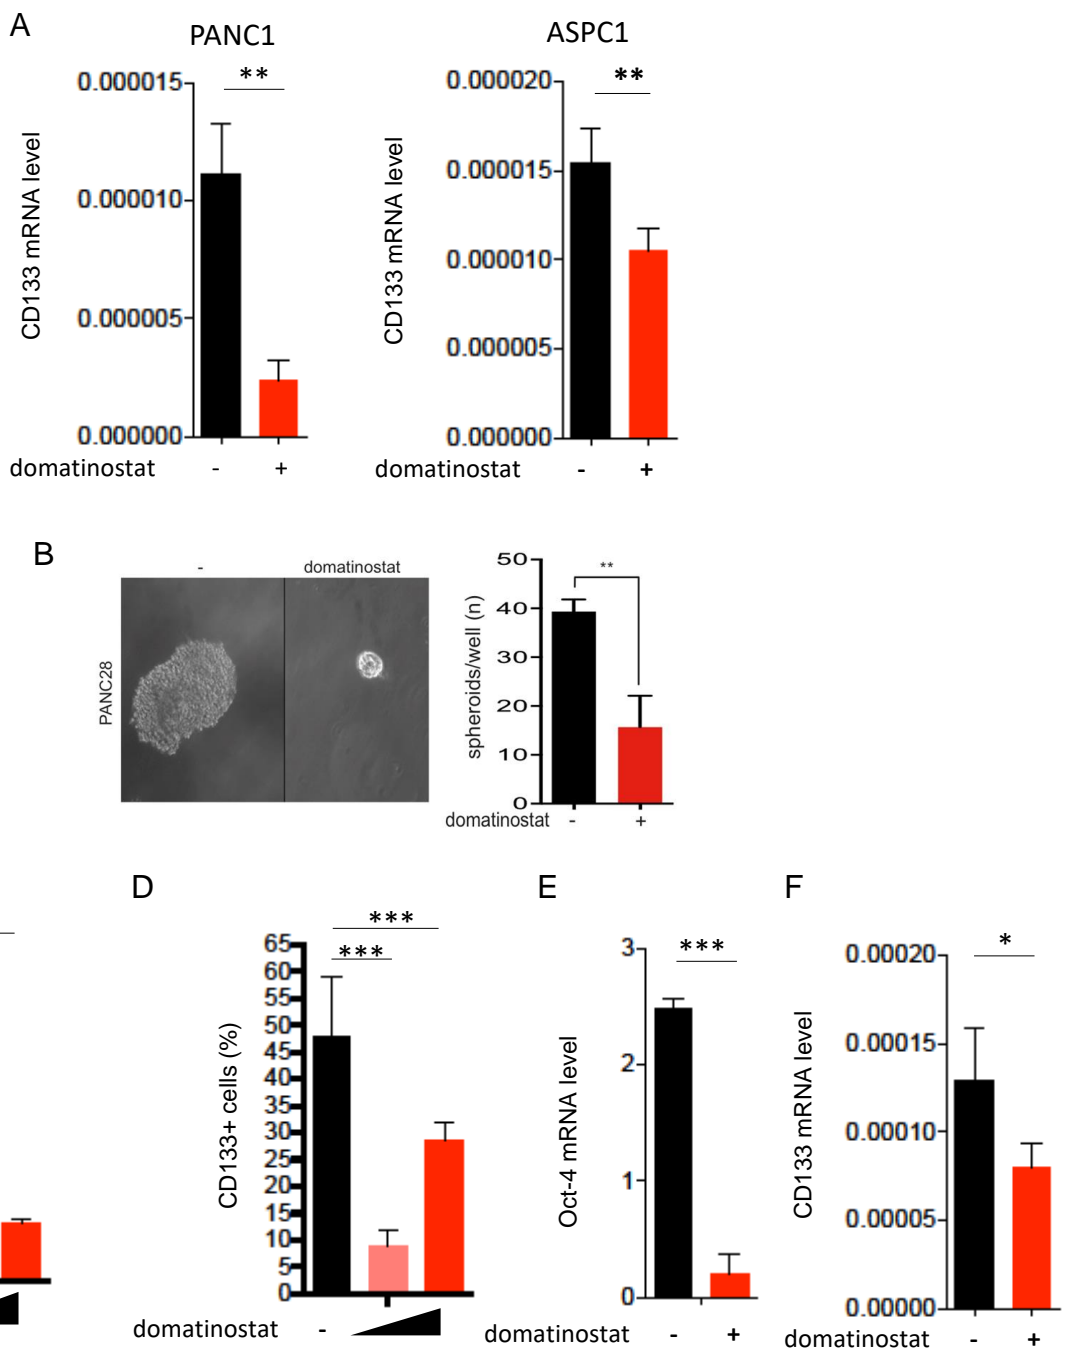

**Supplementary Figure 5. Domatinostat effects on CSC population.**

**A** qRT-PCR analysis shows CD133 levels drop when PANC1 and ASPC1 spheroids are treated with domatinostat (0.5  $\mu\text{M}$ ) for 16h. **B.** The effect of domatinostat (0.5  $\mu\text{M}$ ) on PANC28 spheroid cultures. Cells seeded as described in methods were collected 7 days after treatment. A representative image of one spheroid for each condition is shown (white scale bar: 50  $\mu\text{m}$ , magnification 20X). On the right, bar graphs show the numbers of spheroids for well (mean $\pm$ SD of 2 or more separate experiments each one with technical triplicate). **C.** PANC28 spheroids viability treated with and without domatinostat (0.5  $\mu\text{M}$  and 1  $\mu\text{M}$ ) was assessed by cell titer luminescence assay (mean $\pm$ SD of 2 or more separate experiments each one with technical triplicate). **D.** Flow cytometry shows decreased levels of associated stem cell marker CD133 upon increasing concentration of domatinostat (0.5 and 1  $\mu\text{M}$ ) for 16h. **E.** qRT-PCR analysis shows Oct-4 levels drop when spheroids are treated with domatinostat (0.5  $\mu\text{M}$ ) for 16h. **F.** qRT-PCR analysis shows CD133 levels drop when PANC28 spheroids are treated with domatinostat (0.5  $\mu\text{M}$ ) for 8h.

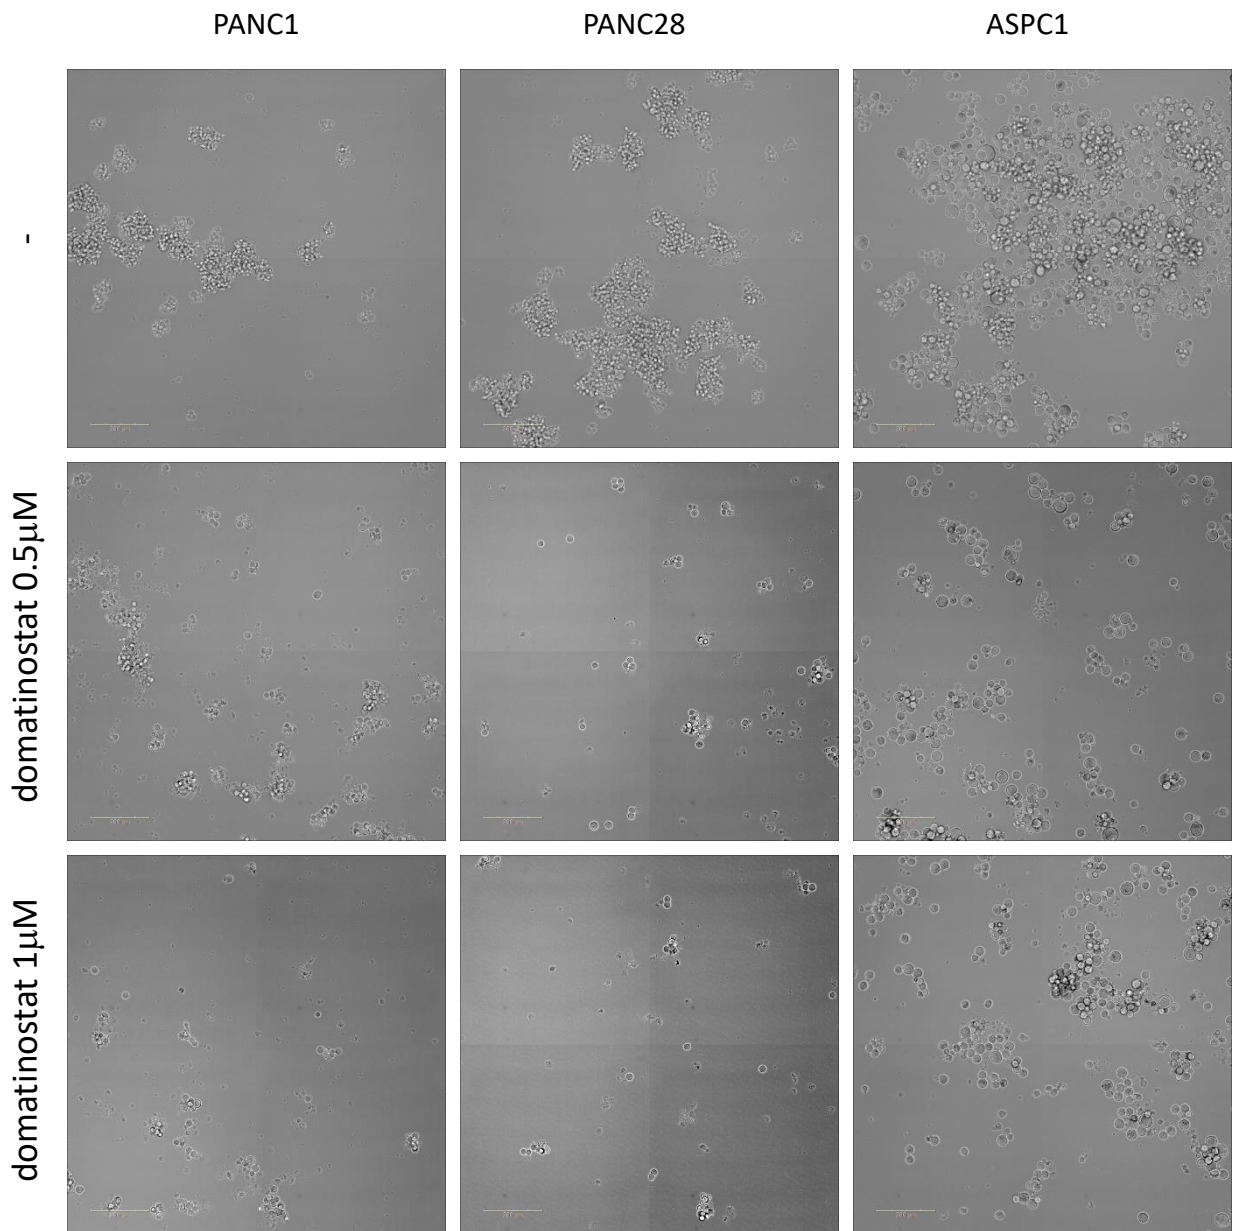

**Supplementary Figure S6. The effect of domatinostat on PDAC spheroid cultures.**

PANC1, PANC28 and ASPC1 cells seeded in sphere medium were treated with and without domatinostat (0.5  $\mu$ M and 1  $\mu$ M) and collected 3 days after treatment. Images of spheroids for each condition in a representative experiment are by Opera Phenix confocal microscopy (magnification 20X-white scale bar: 200 $\mu$ m).

A

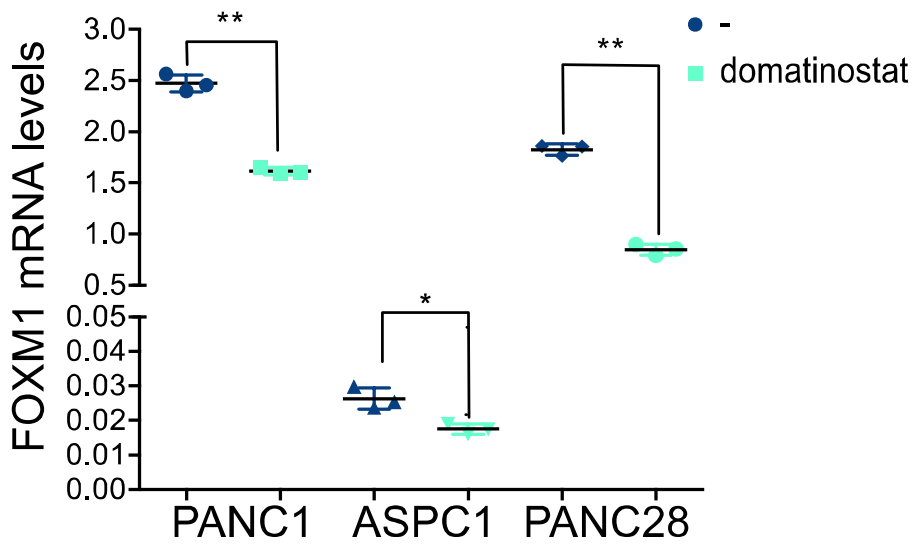

B

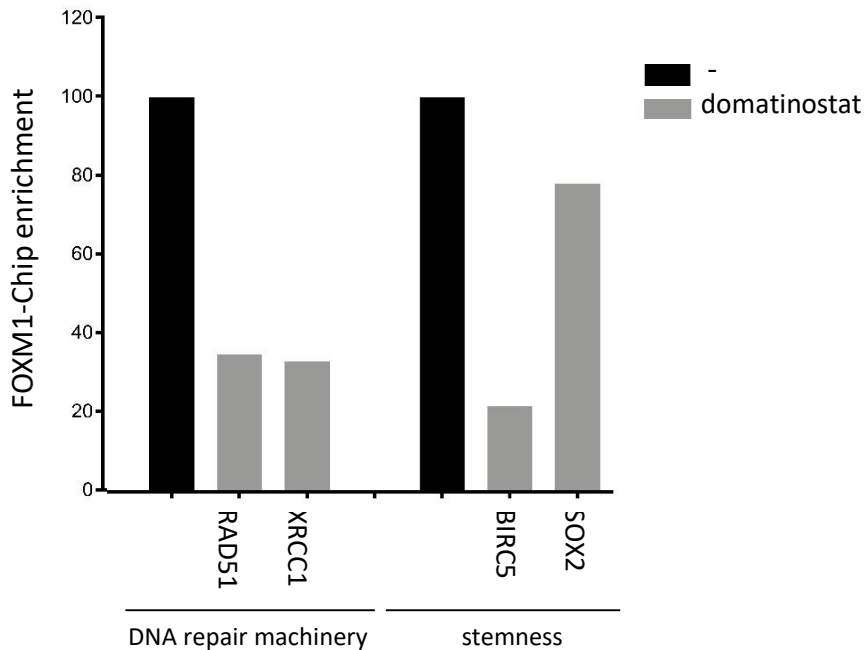

### Supplementary Figure S7. Domatinostat effects on FOXM1 expression.

**A.** qRT-PCR analysis shows FOXM1 levels drop when PANC1, PANC28 and ASPC1 spheroids are treated with domatinostat (0.5  $\mu$ M) for 16h. **B.** CHIP-qPCR analysis showing the relative decrease of enrichment. Data obtained on immunoprecipitated fractions were normalized to input chromatin (IP/Input). After 16 hours of domatinostat (1 $\mu$ M) treatment, PANC1 spheroids are crosslinked and a chromatin immunoprecipitation has been performed as described in Materials and Methods. A representative single experiment is reported.

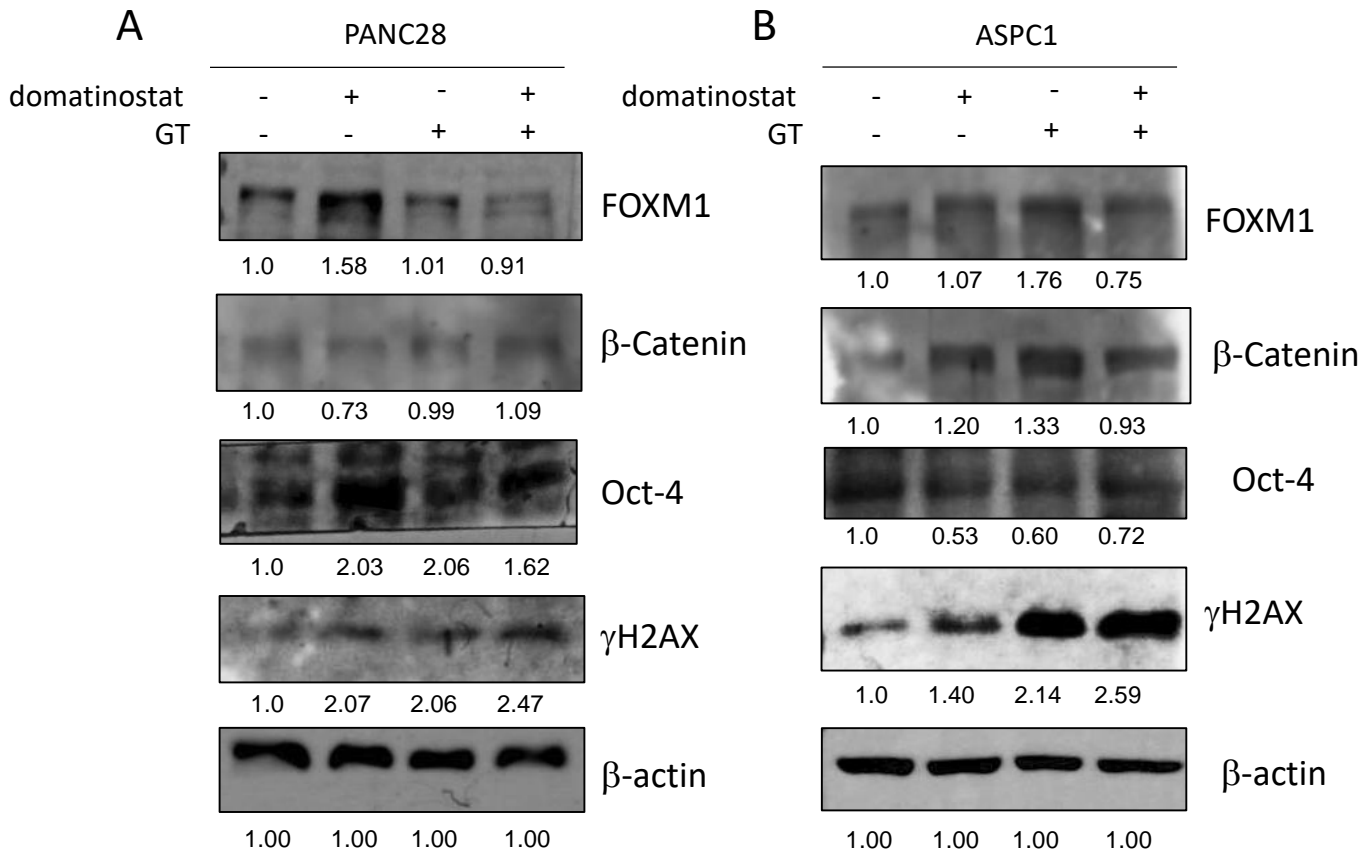

**Supplementary Figure S8. Domatinostat modulates FOXM1 activity**

Western Blot analysis shows decreased protein levels of FOXM1 and associated stem-cell markers ( $\beta$ -Catenin and Oct-4) and increased  $\gamma$ H2AX protein as stress marker in PANC28 (A) and in ASPC1 spheroids (B), treated for 16 hours with domatinostat, GT (IC50 at 96h) and their combination.  $\beta$ -actin serves as control for equal protein loading.

Path Designer Network 1

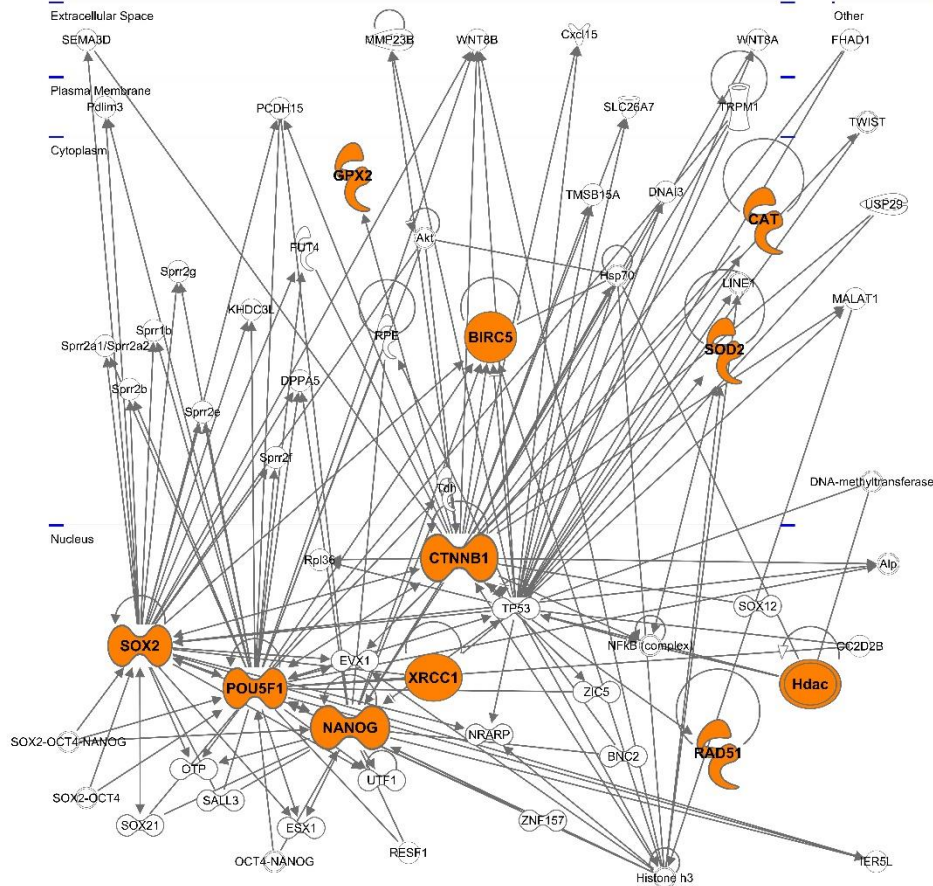

© 2000-2021 QIAGEN. All rights reserved.

| Upstream Regulator | Molecule Type           | p-value of overlap | Target Molecules in Dataset                   |
|--------------------|-------------------------|--------------------|-----------------------------------------------|
| FOXM1              | transcription regulator | 4,20E-16           | BIRC5,CAT,CTNNB1,NANOG,POU5F1,SOD2,SOX2,XRCC1 |
| SOX17              | transcription regulator | 1,10E-09           | CTNNB1,NANOG,POU5F1,SOX2                      |
| PRMT5              | enzyme                  | 7,63E-09           | BIRC5,NANOG,POU5F1,SOX2                       |
| SIRT1              | transcription regulator | 1,53E-08           | BIRC5,CAT,CTNNB1,NANOG,POU5F1,SOD2            |
| FOXD3              | transcription regulator | 1,91E-08           | NANOG,POU5F1,SOX2                             |
| TBX3               | transcription regulator | 3,94E-08           | NANOG,POU5F1,SOX2                             |
| E2F1               | transcription regulator | 5,27E-08           | BIRC5,CTNNB1,NANOG,RAD51,SOD2,XRCC1           |
| GMNN               | transcription regulator | 5,57E-08           | CTNNB1,NANOG,POU5F1,SOX2                      |
| EPAS1              | transcription regulator | 6,57E-08           | CAT,NANOG,POU5F1,SOD2,SOX2                    |
| YY2                | transcription regulator | 7,06E-08           | NANOG,POU5F1,SOX2                             |

© 2000-2021 QIAGEN. All rights reserved.

## Supplementary Figure S9. A network analysis revealed FOXM1 as upstream regulator of significant domatinostat-modulated proteins involved in stemness, oxidative stress and DNA repair.

FOXM1 came out in an Ingenuity Pathway analysis as main significant upstream regulator in a pathway that directly links all domatinostat-targets. Specifically, we used as input to generate the pathway: stemness proteins (BIRC5, NANOG, POU5F1 and SOX2), oxidative stress and DNA damage-related proteins (such as XRCC1, RAD51, SOD2, CAT and GPX2) and HDAC protein.



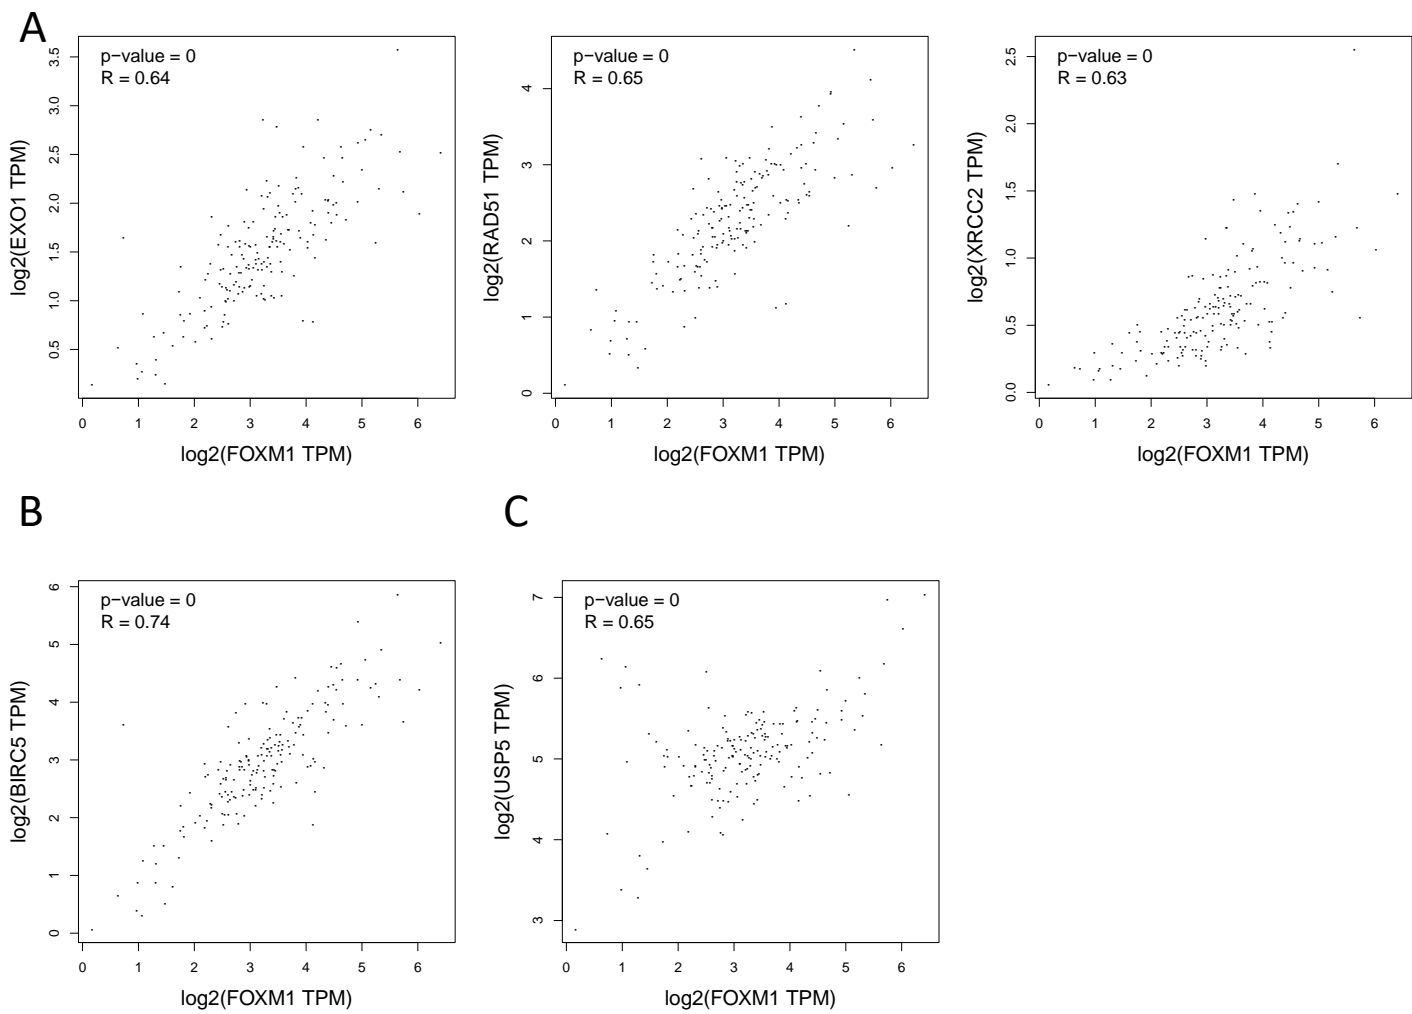

**Supplementary Figure S10. Critical FOXM1 role in pancreatic cancer patients.**

**A.** Scatter plots of mRNA levels (RSEM normalized values) of FOXM1 and representative DNA-damage induced genes (EXO1, RAD51, XRCC2,) in the TCGA PAAD cohort. **B.** Scatter plots of mRNA levels (RSEM normalized values) of FOXM1 and BIRC5 in the TCGA PAAD cohort. **C.** Scatter plots of mRNA levels (RSEM normalized values) of FOXM1 and USP5 in the TCGA PAAD cohort.

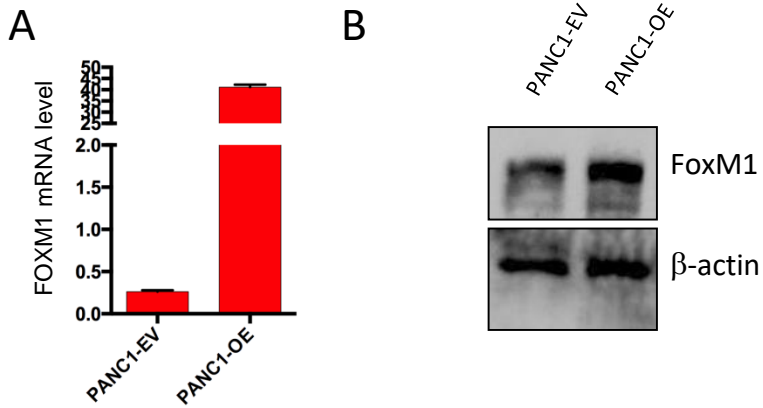

**Supplementary Figure S11. domatinostat modulates FOXM1 activity**

The expression of FOXM1 in PANC1 cells transfected with FOXM1(OE-FOXM1) or with empty vector (EV-FOMX1) evaluated by transcript quantification **(A)** or by WB analysis,  $\beta$ -actin serves as control for equal protein loading **(B)**.

**A**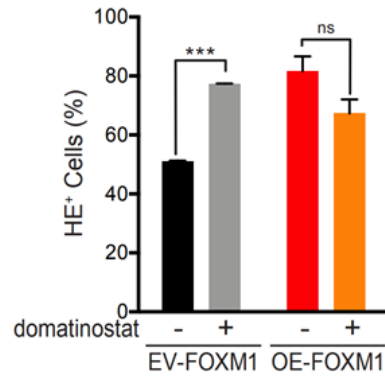**B**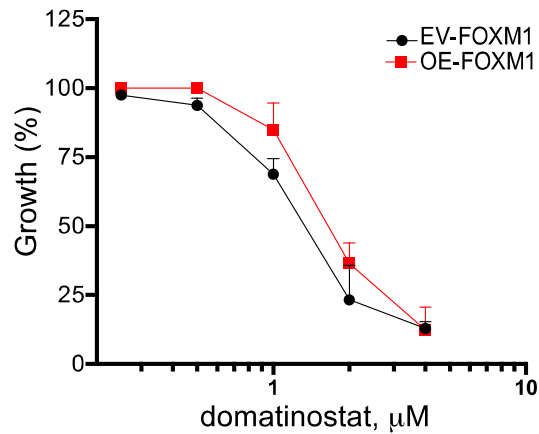**Supplementary Figure S12. Domatinostat modulates FOXM1 activity**

**A.** Cellular ROS in OE-FOXM1 and EV-FOXM1 PANC1, treated or untreated with domatinostat (0.5 μM) for 16h, visualized by Hydroethidine staining. **B.** PANC1 cells transfected with FOXM1 (OE-FOXM1) or with empty vector (EV-FOMX1) were treated for 96h with increasing concentration of domatinostat. Cell growth expressed as percentage of control was assessed by sulforhodamine B colorimetric assay.

**A**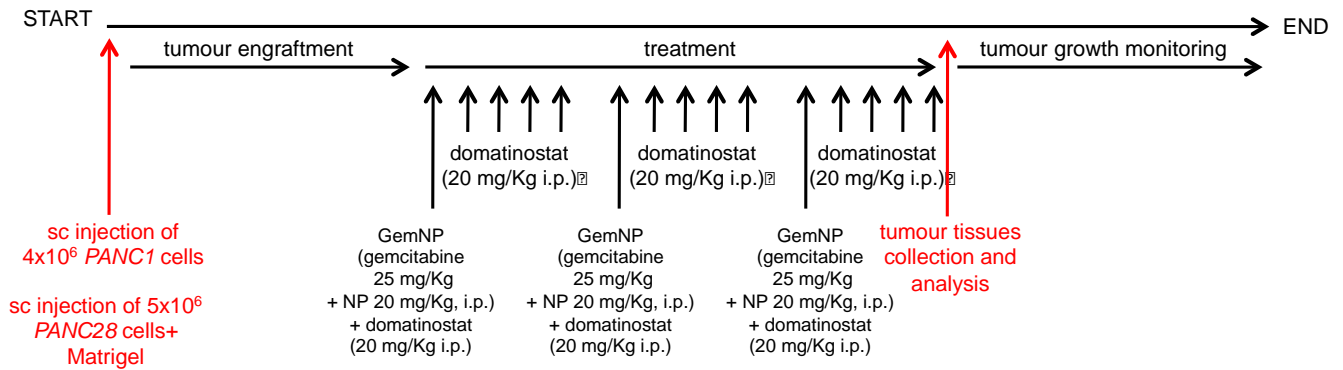**B****PANC28**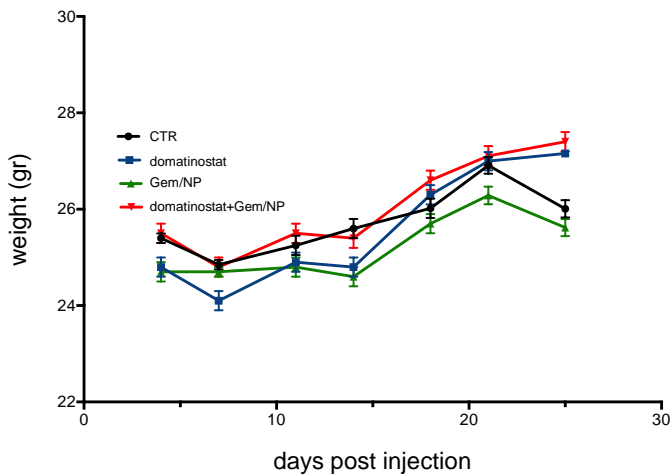**C****PANC1**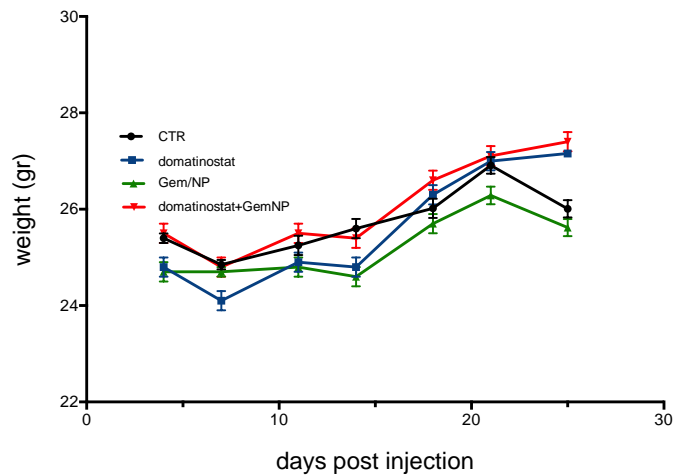

**Supplementary Figure S13. Domatinostat does not exert toxic effect alone and in combination *in vivo*.**

**A.** Representative schedule of *in vivo* treatments with timing and agents concentration **B-C.** Mice body weight measured two times/week in PANC28 and PANC1 xenografts.

**A**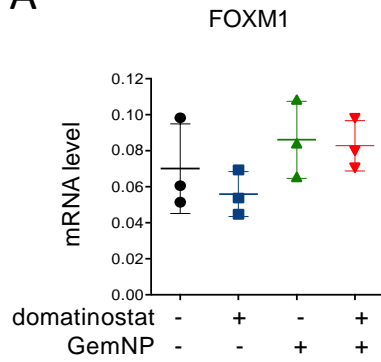**B**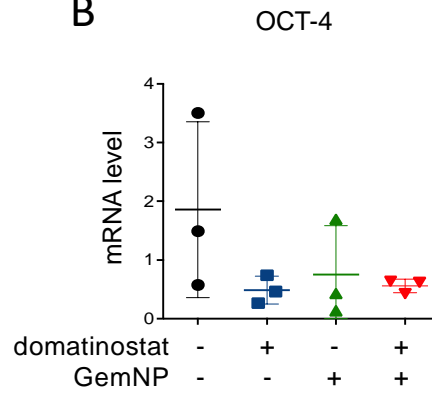

**Supplementary Figure S14. Domatinostat synergistically improves overall survival of PANC1 mice affecting FOXM1 and OCT4 expression.**

**A.** FOXM1 mRNA expression determined by qRT-PCR in PANC1 samples obtained from three PANC1 xenografts from each treatment group at the end of treatment. **B.** OCT-4 mRNA expression determined by qRT-PCR in PANC1 samples obtained from three PANC1 xenografts from each treatment group at the end of treatment.  $\beta$ -actin was used as housekeeping control gene.
